# Supplementary material for: The nuclear 18S ribosomal DNAs of avian haemosporidian parasites
Source: PubMed Central journal article supplement (PMC6724295; doi:10.1186/s12936-019-2940-6), 2019-09-03
Supplement: 12936_2019_2940_MOESM4_ESM.pdf [file 12936_2019_2940_MOESM4_ESM.pdf]

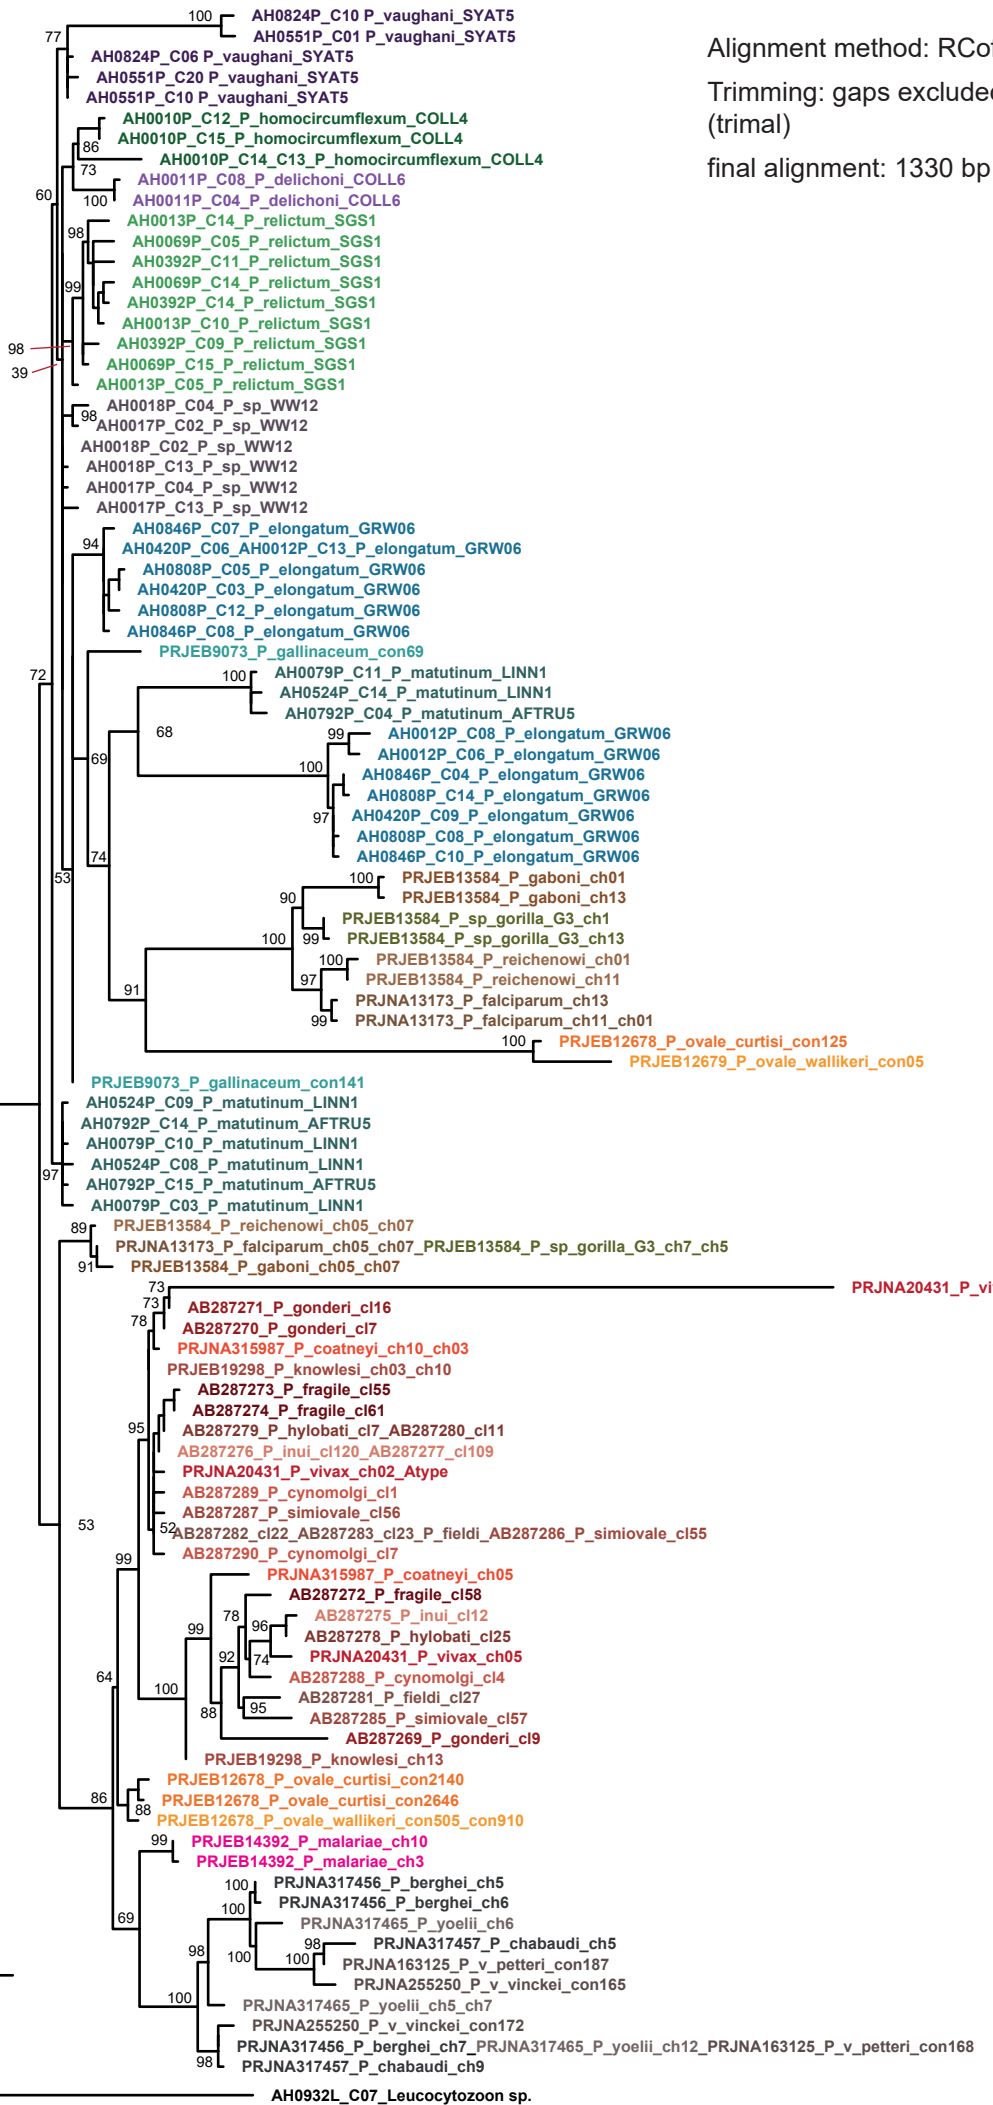

Alignment method: RCoffee (default)  
 Trimming: gaps excluded, strict algorithm (trimal)  
 final alignment: 1330 bp

0.02

AH0932L\_C07\_Leucocytozoon sp.
