# Supplementary material for: The nuclear 18S ribosomal DNAs of avian haemosporidian parasites
Source: PubMed Central journal article supplement (PMC6724295; doi:10.1186/s12936-019-2940-6), 2019-09-03

Alignment method: RCoffee (default)

Trimming: GBLOCK (default)

final alignment: 1360 bp

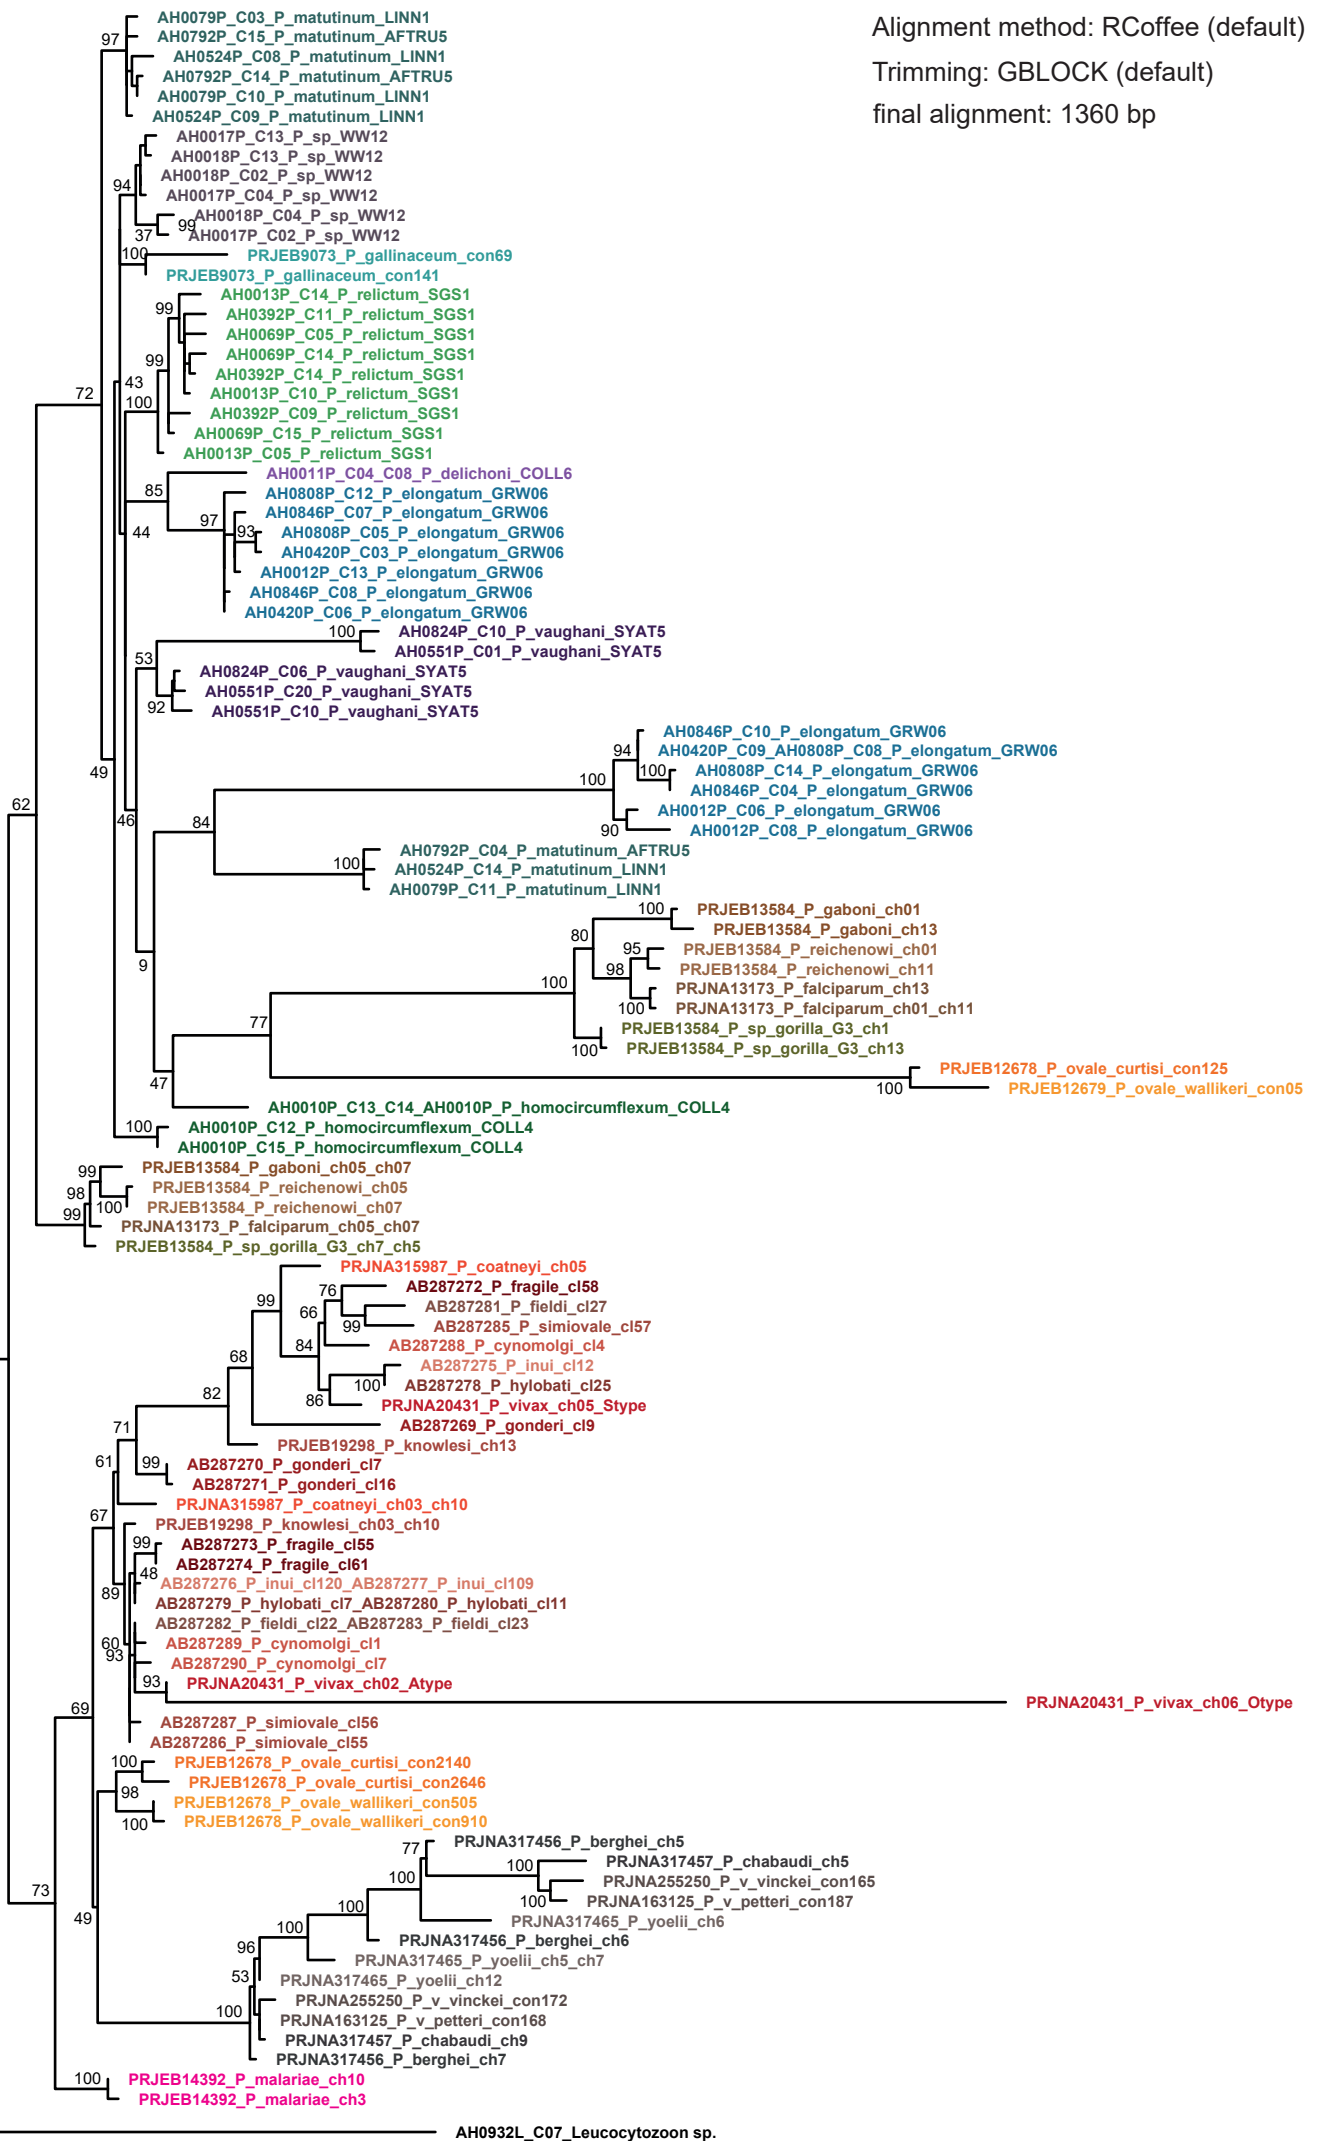

Supplement: 12936_2019_2940_MOESM5_ESM.pdf [file 12936_2019_2940_MOESM5_ESM.pdf]
