# Supplementary material for: The nuclear 18S ribosomal DNAs of avian haemosporidian parasites
Source: Springer Nature journal article supplement (doi:10.1186/s12936-019-2940-6), 2019-09-03

Alignment method: RCoffee (default)

Trimming: gaps excluded

final alignment: 1555 bp

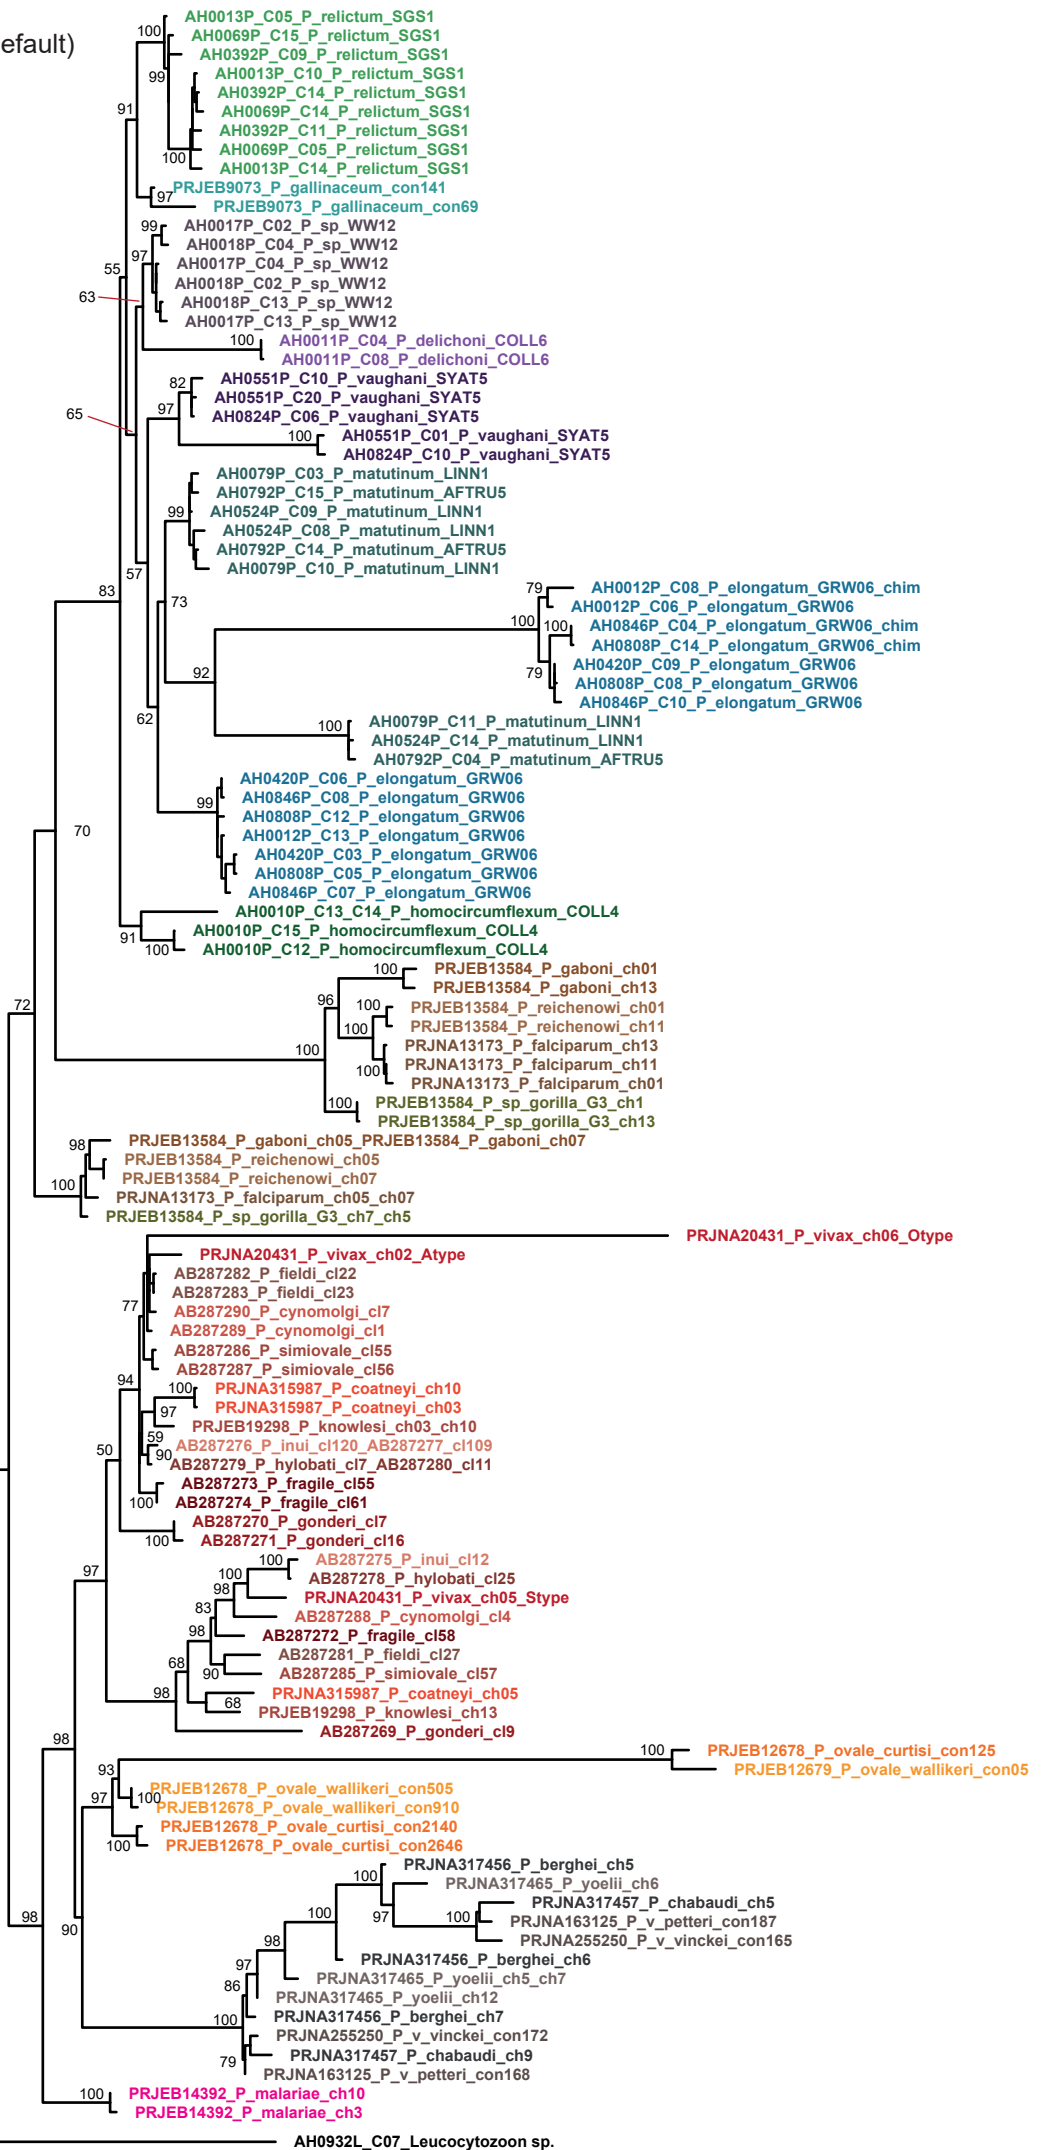

Supplement: MOESM3 [file 17133148]
